# Supplementary material for: The Role of Neighborhood Characteristics in Late Stage Melanoma Diagnosis among Hispanic Men in California, Texas, and Florida, 1996–2012
Source: Hindawi journal article supplement (doi:10.1155/2017/8418904), 2017-01-01

A

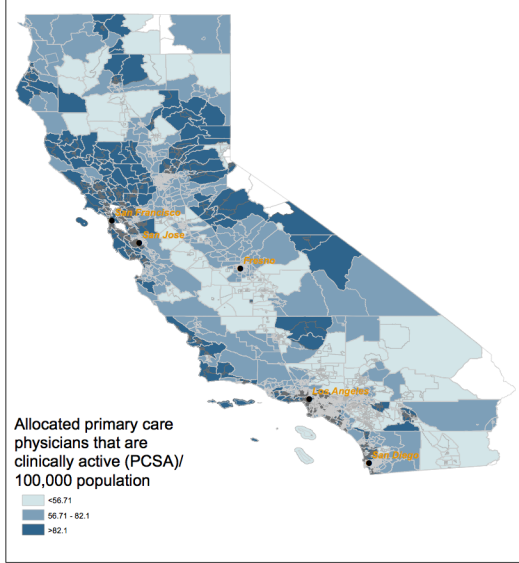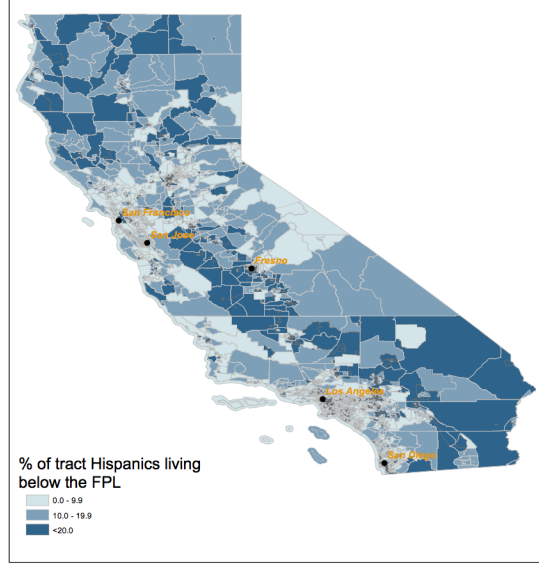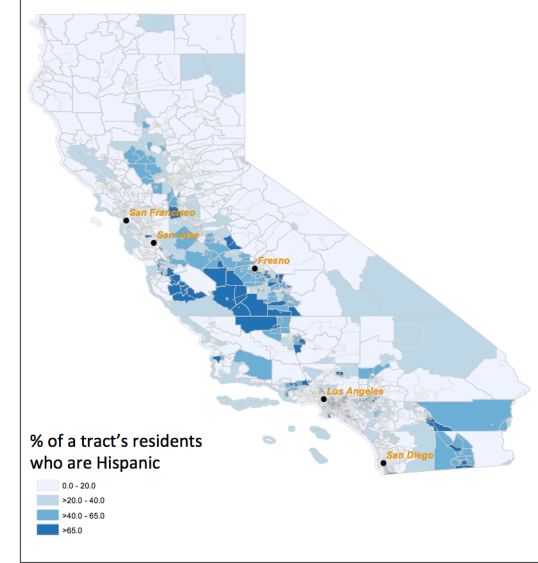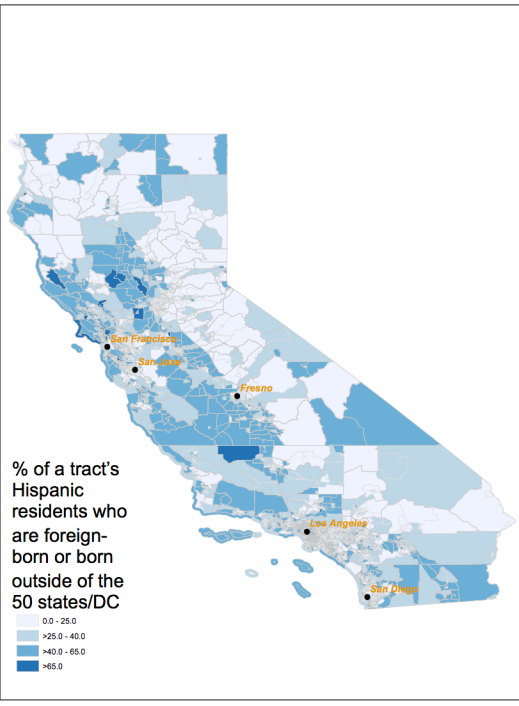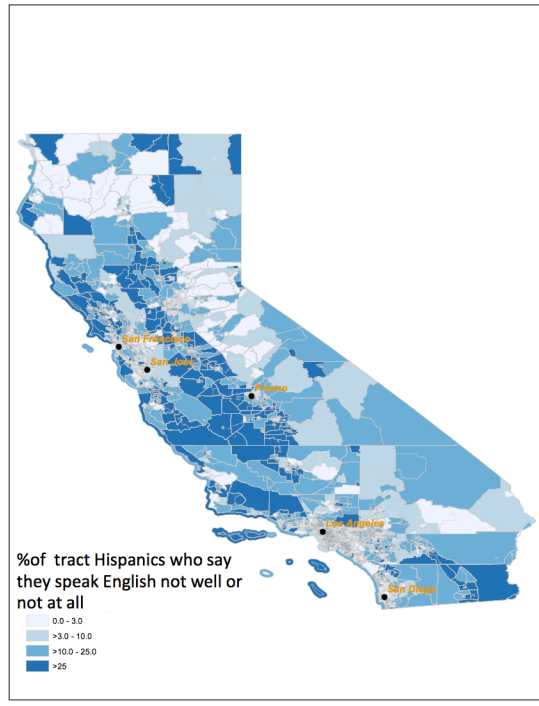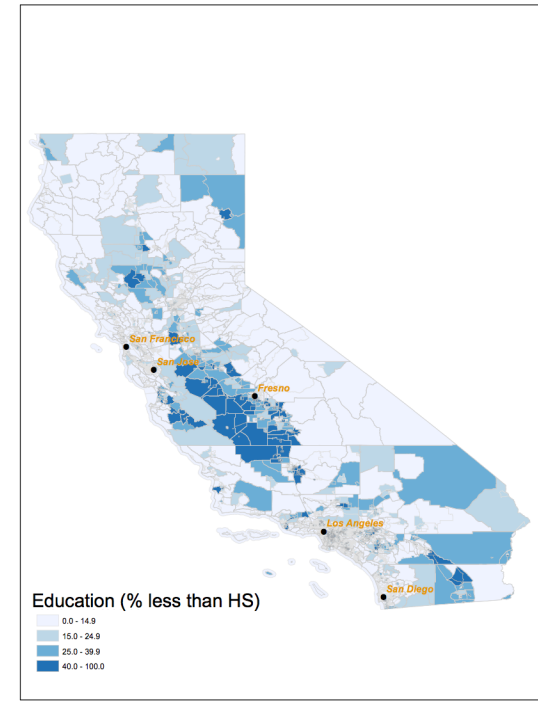

B

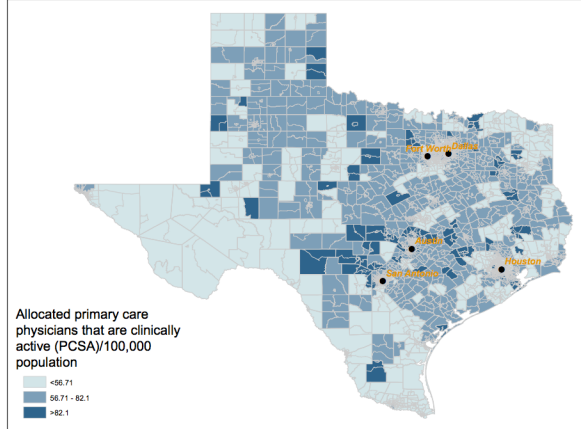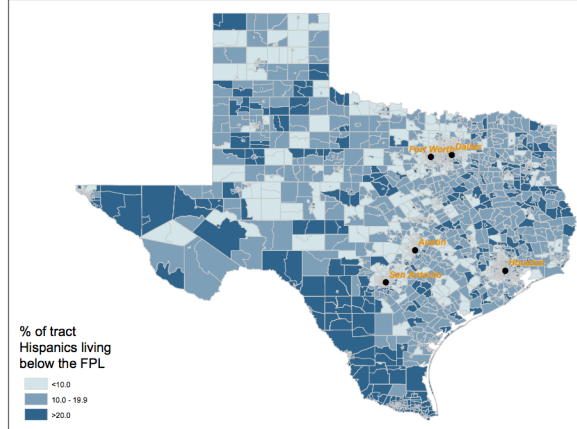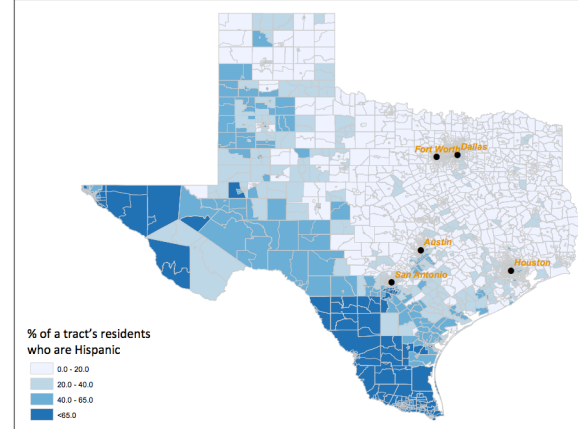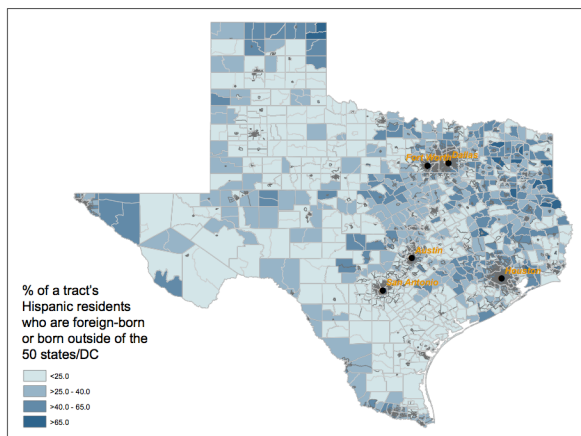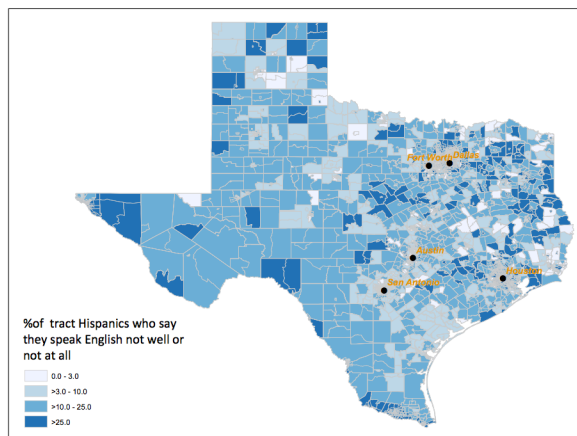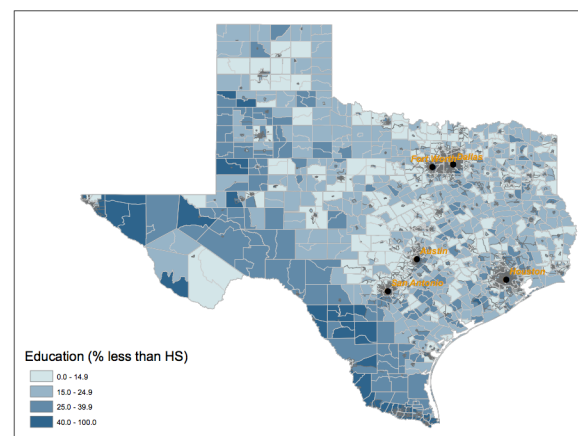

C

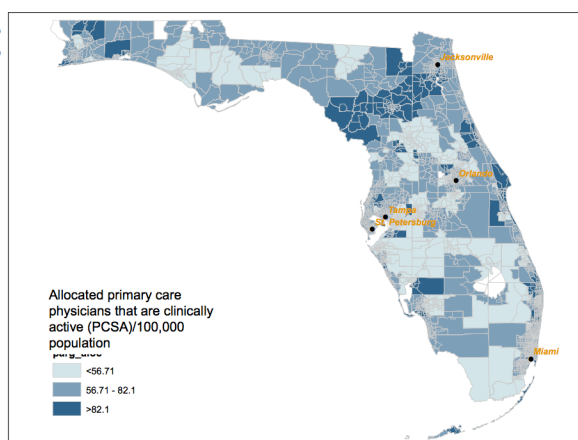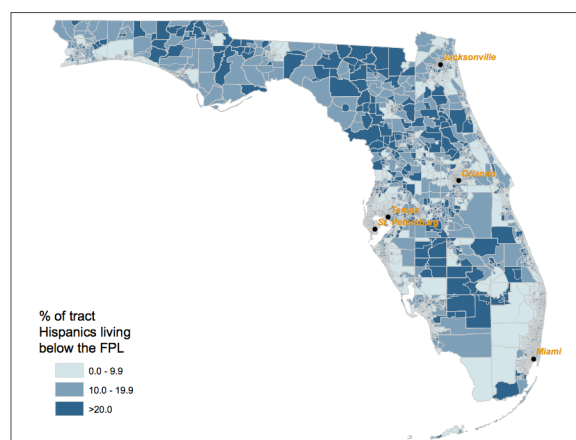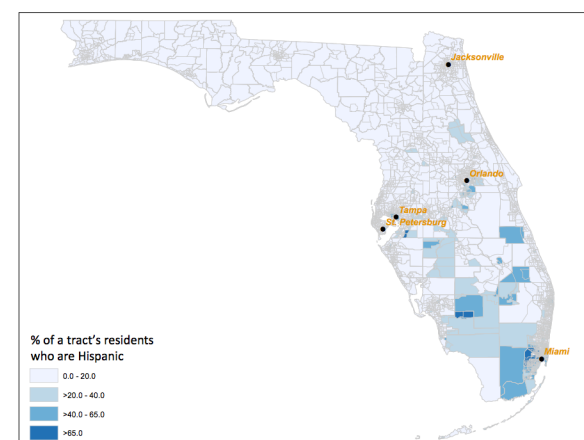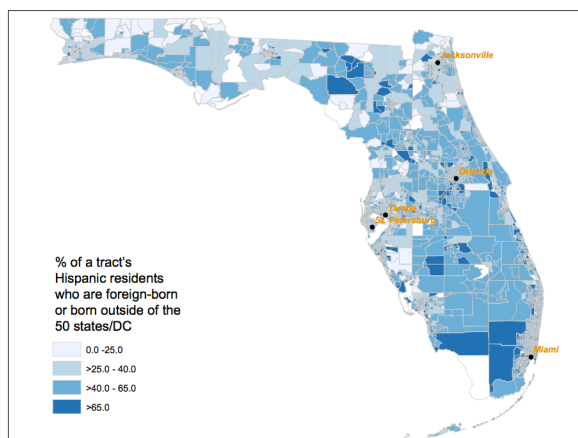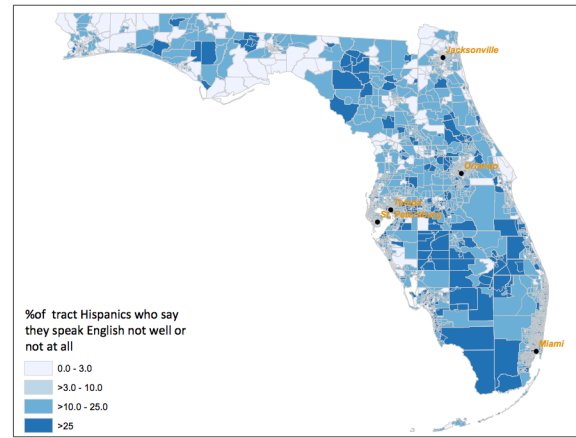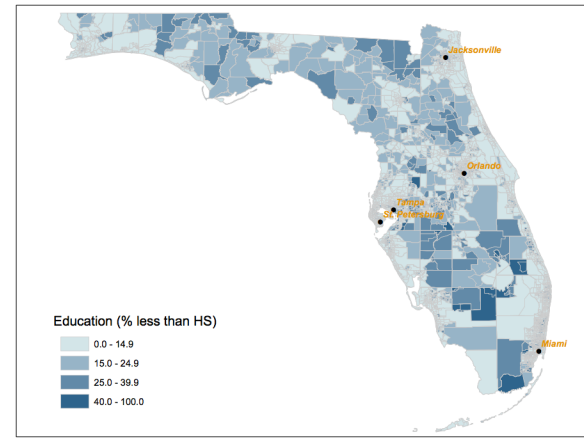

Supplement: f1 [file 8418904.f1.pdf]
